# Supplementary material for: Agreements and disagreements in exercise therapy prescriptions after hip replacement among rehabilitation professionals: a multicenter survey
Source: Springer Nature journal article supplement (doi:10.1186/s12891-015-0646-7), 2015-08-04
Supplement: MOESM1 [file 9752506]

# Fragebogen zur bewegungstherapeutischen Verordnung nach Implantation einer Endoprothese am Hüftgelenk

Liebe Teilnehmer,

für die Erfassung von persönlichen Überzeugungen bzw. institutionellen Richtlinien bei bewegungstherapeutischen Behandlungen nach Implantation einer Endoprothese am Hüftgelenk, möchten wir Sie bitten folgende Fragen zu beantworten. Ihre Angaben werden uns helfen, aktuelle Standards von Nachbehandlungen in der Therapiepraxis zu erfassen und den möglichen Bedarf an weiteren Handlungsrichtlinien zu klären.

Alle Angaben werden selbstverständlich anonymisiert und vertraulich behandelt. Wenn Sie sich bei einer Frage unsicher sind, wählen Sie bitte die Antwort, die Ihrer Meinung nach am besten auf Sie zutrifft.

Vielen Dank für Ihre Mühe.

## **1. Personenbezogene Angaben** (Zutreffendes bitte ankreuzen bzw. Ausfüllen)

1.1. Welcher Berufsgruppe gehören Sie an?

- a. Chirurg(in)
- b. Orthopäd(in)
- c. Arzt/Ärztin in einer Rehabilitationseinrichtung
- d. Sporttherapeut(in)
- e. Physiotherapeut(in)
- f. Andere (bitte angeben) .....

1.2. Wie viele Jahre Berufserfahrung haben Sie? .....

1.3. In welcher der folgenden Einrichtung sind Sie derzeit tätig?

- a. Tagesklinik oder Privatpraxis
- b. Krankenhaus
- c. Rehabilitationseinrichtung
- d. Physiotherapeutische Praxis
- e. Andere (bitte angeben) .....

1.4. Wie viele Patienten mit Implantation einer Endoprothese am Hüftgelenk behandeln Sie durchschnittlich im Monat?

.....

**2. Allgemeine Fragen zur Rehabilitation und Bewegungstherapie nach Implantation einer**

**Endoprothese am Hüftgelenk** (Zutreffendes bitte ankreuzen bzw. Ausfüllen)

2.1. Was hat Ihrer persönlichen Einschätzung nach Einfluss auf die postoperativen Reha-Maßnahmen? (Bitte kreuzen Sie auf der Skala von 1 (unwichtig) bis 5 (sehr wichtig) an, Mehrfachantworten möglich)

|                                             | 1                        | 2                        | 3                        | 4                        | 5                        |
|---------------------------------------------|--------------------------|--------------------------|--------------------------|--------------------------|--------------------------|
| a. Prothesenart (zementiert/zementfrei)     | <input type="checkbox"/> | <input type="checkbox"/> | <input type="checkbox"/> | <input type="checkbox"/> | <input type="checkbox"/> |
| b. Erstversorgung bzw. Zweitversorgung      | <input type="checkbox"/> | <input type="checkbox"/> | <input type="checkbox"/> | <input type="checkbox"/> | <input type="checkbox"/> |
| c. Qualität des chirurgischen Eingriffs     | <input type="checkbox"/> | <input type="checkbox"/> | <input type="checkbox"/> | <input type="checkbox"/> | <input type="checkbox"/> |
| d. OP-Verlauf                               | <input type="checkbox"/> | <input type="checkbox"/> | <input type="checkbox"/> | <input type="checkbox"/> | <input type="checkbox"/> |
| e. Konstitution des Patienten               | <input type="checkbox"/> | <input type="checkbox"/> | <input type="checkbox"/> | <input type="checkbox"/> | <input type="checkbox"/> |
| Weitere mögliche Faktoren (bitte benennen): |                          |                          |                          |                          |                          |
| .....                                       | <input type="checkbox"/> | <input type="checkbox"/> | <input type="checkbox"/> | <input type="checkbox"/> | <input type="checkbox"/> |
| .....                                       | <input type="checkbox"/> | <input type="checkbox"/> | <input type="checkbox"/> | <input type="checkbox"/> | <input type="checkbox"/> |
| .....                                       | <input type="checkbox"/> | <input type="checkbox"/> | <input type="checkbox"/> | <input type="checkbox"/> | <input type="checkbox"/> |
| .....                                       | <input type="checkbox"/> | <input type="checkbox"/> | <input type="checkbox"/> | <input type="checkbox"/> | <input type="checkbox"/> |

2.2. Ab wann sollte nach Ihrer Einschätzung, eine Vollbelastung nach Implantation einer **zementierten** Prothese bei komplikationsfreien Operationsverlauf postoperativ empfohlen werden?

| 0-5<br>Tage              | 6-10<br>Tage             | 11-20<br>Tage            | 21-30<br>Tage            | 5-6<br>Wochen            | 7-8<br>Wochen            | mehr als 8<br>Wochen     |
|--------------------------|--------------------------|--------------------------|--------------------------|--------------------------|--------------------------|--------------------------|
| <input type="checkbox"/> | <input type="checkbox"/> | <input type="checkbox"/> | <input type="checkbox"/> | <input type="checkbox"/> | <input type="checkbox"/> | <input type="checkbox"/> |

2.3. Ab wann sollte nach Ihrer Einschätzung, eine Vollbelastung nach Implantation einer **nicht-zementierten** Prothese bei komplikationsfreien Operationsverlauf postoperativ empfohlen werden?

| 0-5<br>Tage              | 6-10<br>Tage             | 11-20<br>Tage            | 21-30<br>Tage            | 5-6<br>Wochen            | 7-8<br>Wochen            | mehr als 8<br>Wochen     |
|--------------------------|--------------------------|--------------------------|--------------------------|--------------------------|--------------------------|--------------------------|
| <input type="checkbox"/> | <input type="checkbox"/> | <input type="checkbox"/> | <input type="checkbox"/> | <input type="checkbox"/> | <input type="checkbox"/> | <input type="checkbox"/> |

2.4. Wann sollten Ihrer Einschätzung nach medizinische Trainingstherapie (keine physiotherapeutische Akutversorgung) nach Implantation einer **zementierten** Prothese bei komplikationsfreien Operationsverlauf idealerweise beginnen?

| 1-7 Tage<br>postoperativ | 2-3 Wochen<br>postoperativ | 4-5 Wochen<br>postoperativ | 6-7 Wochen<br>postoperativ | mehr als 8<br>Wochen<br>postoperativ |
|--------------------------|----------------------------|----------------------------|----------------------------|--------------------------------------|
| <input type="checkbox"/> | <input type="checkbox"/>   | <input type="checkbox"/>   | <input type="checkbox"/>   | <input type="checkbox"/>             |

2.5. Wann sollten Ihrer Einschätzung nach medizinische Trainingstherapie (keine physiotherapeutische Akutversorgung) nach Implantation einer **nicht-zementierten** Prothese bei komplikationsfreien Operationsverlauf idealerweise beginnen?

|                                  |                                    |                                    |                                    |                                               |
|----------------------------------|------------------------------------|------------------------------------|------------------------------------|-----------------------------------------------|
| <b>1-7 Tage<br/>postoperativ</b> | <b>2-3 Wochen<br/>postoperativ</b> | <b>4-5 Wochen<br/>postoperativ</b> | <b>6-7 Wochen<br/>postoperativ</b> | <b>mehr als 8<br/>Wochen<br/>postoperativ</b> |
| <input type="checkbox"/>         | <input type="checkbox"/>           | <input type="checkbox"/>           | <input type="checkbox"/>           | <input type="checkbox"/>                      |

### 3. Fragen zu Inhalten und Zielen der Rehabilitation:

3.1. Welche Maßnahmen werden in Ihrer Einrichtung (mit welcher Priorität) in der Standard-Rehabilitation von Hüft-TEP Patienten durchgeführt. Bitte kreuzen Sie auf der Skala von 1 (höchste Priorität) bis 5 (niedrigste Priorität) an.

|                              | <b>1</b>                 | <b>2</b>                 | <b>3</b>                 | <b>4</b>                 | <b>5</b>                 |
|------------------------------|--------------------------|--------------------------|--------------------------|--------------------------|--------------------------|
| a. MTT Gerätegestützt        | <input type="checkbox"/> | <input type="checkbox"/> | <input type="checkbox"/> | <input type="checkbox"/> | <input type="checkbox"/> |
| b. Motorschiene              | <input type="checkbox"/> | <input type="checkbox"/> | <input type="checkbox"/> | <input type="checkbox"/> | <input type="checkbox"/> |
| c. Sensomotorisches Training | <input type="checkbox"/> | <input type="checkbox"/> | <input type="checkbox"/> | <input type="checkbox"/> | <input type="checkbox"/> |
| d. Dehnung                   | <input type="checkbox"/> | <input type="checkbox"/> | <input type="checkbox"/> | <input type="checkbox"/> | <input type="checkbox"/> |
| e. Wassergymnastik           | <input type="checkbox"/> | <input type="checkbox"/> | <input type="checkbox"/> | <input type="checkbox"/> | <input type="checkbox"/> |
| f. Gangschulung              | <input type="checkbox"/> | <input type="checkbox"/> | <input type="checkbox"/> | <input type="checkbox"/> | <input type="checkbox"/> |
| g. Treppentraining           | <input type="checkbox"/> | <input type="checkbox"/> | <input type="checkbox"/> | <input type="checkbox"/> | <input type="checkbox"/> |
| h. Fahrradergometer          | <input type="checkbox"/> | <input type="checkbox"/> | <input type="checkbox"/> | <input type="checkbox"/> | <input type="checkbox"/> |
| i. Walking                   | <input type="checkbox"/> | <input type="checkbox"/> | <input type="checkbox"/> | <input type="checkbox"/> | <input type="checkbox"/> |
| j. Manuelle Therapie         | <input type="checkbox"/> | <input type="checkbox"/> | <input type="checkbox"/> | <input type="checkbox"/> | <input type="checkbox"/> |
| k. Einzel KG                 | <input type="checkbox"/> | <input type="checkbox"/> | <input type="checkbox"/> | <input type="checkbox"/> | <input type="checkbox"/> |
| l. Gruppen KG                | <input type="checkbox"/> | <input type="checkbox"/> | <input type="checkbox"/> | <input type="checkbox"/> | <input type="checkbox"/> |

3.2. Welche Ziele werden in Ihrer Einrichtung (mit welcher Priorität) in der Standard-Rehabilitation von Hüft-TEP Patienten verfolgt. Bitte kreuzen Sie auf der Skala von 1(höchste Priorität) bis 5(niedrigste Priorität) an.

|                                                  | <b>1</b>                 | <b>2</b>                 | <b>3</b>                 | <b>4</b>                 | <b>5</b>                 |
|--------------------------------------------------|--------------------------|--------------------------|--------------------------|--------------------------|--------------------------|
| a. Verbesserung des Gleichgewichts               | <input type="checkbox"/> | <input type="checkbox"/> | <input type="checkbox"/> | <input type="checkbox"/> | <input type="checkbox"/> |
| b. Behandlung von muskulären Dysbalancen         | <input type="checkbox"/> | <input type="checkbox"/> | <input type="checkbox"/> | <input type="checkbox"/> | <input type="checkbox"/> |
| c. Verbesserung der Beweglichkeit                | <input type="checkbox"/> | <input type="checkbox"/> | <input type="checkbox"/> | <input type="checkbox"/> | <input type="checkbox"/> |
| d. Wiederherstellung des funktionalen Gangbildes | <input type="checkbox"/> | <input type="checkbox"/> | <input type="checkbox"/> | <input type="checkbox"/> | <input type="checkbox"/> |
| e. Alltagsaktivität verbessern                   | <input type="checkbox"/> | <input type="checkbox"/> | <input type="checkbox"/> | <input type="checkbox"/> | <input type="checkbox"/> |
| f. Rumpfstabilität                               | <input type="checkbox"/> | <input type="checkbox"/> | <input type="checkbox"/> | <input type="checkbox"/> | <input type="checkbox"/> |
| g. Schmerzreduktion/ Schmerzfreiheit             | <input type="checkbox"/> | <input type="checkbox"/> | <input type="checkbox"/> | <input type="checkbox"/> | <input type="checkbox"/> |
| h. Kräftigung der hüftumgreifenden Muskulatur    | <input type="checkbox"/> | <input type="checkbox"/> | <input type="checkbox"/> | <input type="checkbox"/> | <input type="checkbox"/> |

3.3. Wie sollte Ihrer Einschätzung nach **15 Tage postoperativ** das subjektive Belastungsempfinden in der medizinischen Trainingstherapie bei Krafttraining der unteren Extremitäten auf einer Skala zwischen 6 und 20 (Borg Skala) durchschnittlich sein?

|                  |    |                          |
|------------------|----|--------------------------|
|                  | 6  | <input type="checkbox"/> |
| sehr sehr leicht | 7  | <input type="checkbox"/> |
|                  | 8  | <input type="checkbox"/> |
| sehr leicht      | 9  | <input type="checkbox"/> |
|                  | 10 | <input type="checkbox"/> |
| leicht           | 11 | <input type="checkbox"/> |
|                  | 12 | <input type="checkbox"/> |
| mittel           | 13 | <input type="checkbox"/> |
|                  | 14 | <input type="checkbox"/> |
| schwer           | 15 | <input type="checkbox"/> |
|                  | 16 | <input type="checkbox"/> |
| sehr schwer      | 17 | <input type="checkbox"/> |
|                  | 18 | <input type="checkbox"/> |
| sehr sehr schwer | 19 | <input type="checkbox"/> |
|                  | 20 | <input type="checkbox"/> |

3.4. Wie sollte Ihrer Einschätzung nach **3 Monate postoperativ** das subjektive Belastungsempfinden in der medizinischen Trainingstherapie bei Krafttraining der unteren Extremitäten auf einer Skala zwischen 6 und 20 (Borg Skala) durchschnittlich sein?

|                  |    |                          |
|------------------|----|--------------------------|
|                  | 6  | <input type="checkbox"/> |
| sehr sehr leicht | 7  | <input type="checkbox"/> |
|                  | 8  | <input type="checkbox"/> |
| sehr leicht      | 9  | <input type="checkbox"/> |
|                  | 10 | <input type="checkbox"/> |
| leicht           | 11 | <input type="checkbox"/> |
|                  | 12 | <input type="checkbox"/> |
| mittel           | 13 | <input type="checkbox"/> |
|                  | 14 | <input type="checkbox"/> |
| schwer           | 15 | <input type="checkbox"/> |
|                  | 16 | <input type="checkbox"/> |
| sehr schwer      | 17 | <input type="checkbox"/> |
|                  | 18 | <input type="checkbox"/> |
| sehr sehr schwer | 19 | <input type="checkbox"/> |
|                  | 20 | <input type="checkbox"/> |

#### 4. Fragen zur Einschätzung der Gelenkbelastung

4.1. Bitte schätzen Sie die Gelenkbelastung der Hüfte, von 1 (sehr geringe Belastung) bis 10 (maximale Belastung) bei folgenden Übungen/Bewegungen ein.

|                                        | 1                        | 2                        | 3                        | 4                        | 5                        | 6                        | 7                        | 8                        | 9                        | 10                       |
|----------------------------------------|--------------------------|--------------------------|--------------------------|--------------------------|--------------------------|--------------------------|--------------------------|--------------------------|--------------------------|--------------------------|
| a. Ergometer- geringer Tretwiderstand, | <input type="checkbox"/> | <input type="checkbox"/> | <input type="checkbox"/> | <input type="checkbox"/> | <input type="checkbox"/> | <input type="checkbox"/> | <input type="checkbox"/> | <input type="checkbox"/> | <input type="checkbox"/> | <input type="checkbox"/> |
| b. Ergometer- hoher Tretwiderstand     | <input type="checkbox"/> | <input type="checkbox"/> | <input type="checkbox"/> | <input type="checkbox"/> | <input type="checkbox"/> | <input type="checkbox"/> | <input type="checkbox"/> | <input type="checkbox"/> | <input type="checkbox"/> | <input type="checkbox"/> |
| c. Gehen 4km/h                         | <input type="checkbox"/> | <input type="checkbox"/> | <input type="checkbox"/> | <input type="checkbox"/> | <input type="checkbox"/> | <input type="checkbox"/> | <input type="checkbox"/> | <input type="checkbox"/> | <input type="checkbox"/> | <input type="checkbox"/> |
| d. Einbeinstand                        | <input type="checkbox"/> | <input type="checkbox"/> | <input type="checkbox"/> | <input type="checkbox"/> | <input type="checkbox"/> | <input type="checkbox"/> | <input type="checkbox"/> | <input type="checkbox"/> | <input type="checkbox"/> | <input type="checkbox"/> |
| e. Sitzen                              | <input type="checkbox"/> | <input type="checkbox"/> | <input type="checkbox"/> | <input type="checkbox"/> | <input type="checkbox"/> | <input type="checkbox"/> | <input type="checkbox"/> | <input type="checkbox"/> | <input type="checkbox"/> | <input type="checkbox"/> |
| f. Aufstehen vom Stuhl                 | <input type="checkbox"/> | <input type="checkbox"/> | <input type="checkbox"/> | <input type="checkbox"/> | <input type="checkbox"/> | <input type="checkbox"/> | <input type="checkbox"/> | <input type="checkbox"/> | <input type="checkbox"/> | <input type="checkbox"/> |
| g. Schulterbrücke / Bridging           | <input type="checkbox"/> | <input type="checkbox"/> | <input type="checkbox"/> | <input type="checkbox"/> | <input type="checkbox"/> | <input type="checkbox"/> | <input type="checkbox"/> | <input type="checkbox"/> | <input type="checkbox"/> | <input type="checkbox"/> |
| h. Abduktion in Seitlage               | <input type="checkbox"/> | <input type="checkbox"/> | <input type="checkbox"/> | <input type="checkbox"/> | <input type="checkbox"/> | <input type="checkbox"/> | <input type="checkbox"/> | <input type="checkbox"/> | <input type="checkbox"/> | <input type="checkbox"/> |

**Vielen Dank für die Teilnahme an der Befragung.**
